# Supplementary material for: Long genes and genes with multiple splice variants are enriched in pathways linked to cancer and other multigenic diseases
Source: PubMed Central journal article supplement (PMC4788956; doi:10.1186/s12864-016-2582-9), 2016-03-12
Supplement: 12864_2016_2582_MOESM1_ESM.pdf [file 12864_2016_2582_MOESM1_ESM.pdf]

# Long genes and genes with multiple splice variants are enriched in pathways linked to cancer and other multigenic diseases

Aleksandr B. Sahakyan<sup>1,2</sup> and Shankar Balasubramanian<sup>1,2,3,\*</sup>

<sup>1</sup> Department of Chemistry, University of Cambridge, Lensfield Road, Cambridge CB2 1EW, UK.

<sup>2</sup> Cancer Research UK Cambridge Institute, University of Cambridge, Li Ka Shing Centre, Robinson Way, Cambridge CB2 0RE, UK.

<sup>3</sup> School of Clinical Medicine, University of Cambridge, Cambridge CB2 0SP, UK.

\* Correspondence: sb10031@cam.ac.uk

## Additional file 1: Supplementary Notes, Tables and Figures

### Contents

|           |      |    |
|-----------|------|----|
| Note S1   | ---- | 2  |
| Note S2   | ---- | 5  |
| Table S1  | ---- | 8  |
| Table S2  | ---- | 9  |
| Table S3  | ---- | 10 |
| Table S4  | ---- | 11 |
| Figure S1 | ---- | 12 |
| Figure S2 | ---- | 13 |
| Figure S3 | ---- | 14 |
| Figure S4 | ---- | 15 |
| Figure S5 | ---- | 16 |
| Figure S6 | ---- | 17 |
| Figure S7 | ---- | 18 |

## Note S1 The list of KEGG pathway names, in the same order as in Figure 2A

1 - OLFACTORY\_TRANSDUCTION  
2 - TASTE\_TRANSDUCTION  
3 - SYSTEMIC\_LUPUS\_ERYTHEMATOSUS  
4 - RIBOSOME  
5 - AUTOIMMUNE\_THYROID\_DISEASE  
6 - ASTHMA  
7 - ALLOGRAFT\_REJECTION  
8 - MATURITY\_ONSET\_DIABETES\_OF\_THE\_YOUNG  
9 - GRAFT\_VERSUS\_HOST\_DISEASE  
10 - ANTIGEN\_PROCESSING\_AND\_PRESENTATION  
11 - CYTOSOLIC\_DNA\_SENSING\_PATHWAY  
12 - TYPE\_I\_DIABETES\_MELLITUS  
13 - REGULATION\_OF\_AUTOPHAGY  
14 - OXIDATIVE\_PHOSPHORYLATION  
15 - PARKINSONS\_DISEASE  
16 - FOLATE\_BIOSYNTHESIS  
17 - INTESTINAL\_IMMUNE\_NETWORK\_FOR\_IGA\_PRODUCTION  
18 - CYTOKINE\_CYTOKINE\_RECEPTOR\_INTERACTION  
19 - BASE\_EXCISION\_REPAIR  
20 - GLUTATHIONE\_METABOLISM  
21 - PRIMARY\_IMMUNODEFICIENCY  
22 - LEISHMANIA\_INFECTION  
23 - RIG\_I\_LIKE\_RECEPTOR\_SIGNALING\_PATHWAY  
24 - PROTEASOME  
25 - ARACHIDONIC\_ACID\_METABOLISM  
26 - ALZHEIMERS\_DISEASE  
27 - HUNTINGTONS\_DISEASE  
28 - SPLICEOSOME  
29 - RNA\_POLYMERASE  
30 - GLYCOSYLPHOSPHATIDYLINOSITOL\_GPI\_ANCHOR\_BIOSYNTHESIS  
31 - TOLL\_LIKE\_RECEPTOR\_SIGNALING\_PATHWAY  
32 - PATHOGENIC\_ESCHERICHIA\_COLI\_INFECTION  
33 - NATURAL\_KILLER\_CELL\_MEDIATED\_CYTOTOXICITY  
34 - METABOLISM\_OF\_XENOBIOTICS\_BY\_CYTOCHROME\_P450  
35 - OTHER\_GLYCAN\_DEGRADATION  
36 - HEMATOPOIETIC\_CELL\_LINEAGE  
37 - VALINE\_LEUCINE\_AND\_ISOLEUCINE\_BIOSYNTHESIS  
38 - PROXIMAL\_TUBULE\_BICARBONATE\_RECLAMATION  
39 - CARDIAC\_MUSCLE\_CONTRACTION  
40 - SULFUR\_METABOLISM  
41 - GLYCOLYSIS\_GLUconeogenesis  
42 - GLYCOSPHINGOLIPID\_BIOSYNTHESIS\_LACTO\_AND\_NEOLACTO\_SERIES  
43 - PRION\_DISEASES  
44 - NEUROACTIVE\_LIGAND\_RECEPTOR\_INTERACTION  
45 - ALPHA\_LINOLENIC\_ACID\_METABOLISM  
46 - LINOLEIC\_ACID\_METABOLISM  
47 - TYROSINE\_METABOLISM  
48 - DRUG\_METABOLISM\_CYTOCHROME\_P450  
49 - PPAR\_SIGNALING\_PATHWAY  
50 - RNA\_DEGRADATION  
51 - TERPENOID\_BACKBONE\_BIOSYNTHESIS  
52 - GLYCINE\_SERINE\_AND\_THREONINE\_METABOLISM  
53 - NOD\_LIKE\_RECEPTOR\_SIGNALING\_PATHWAY  
54 - GLYCOSAMINOGLYCAN\_BIOSYNTHESIS\_KERATAN\_SULFATE  
55 - BLADDER\_CANCER  
56 - PEROXISOME  
57 - ETHER\_LIPID\_METABOLISM  
58 - RETINOL\_METABOLISM  
59 - STEROID\_BIOSYNTHESIS  
60 - JAK\_STAT\_SIGNALING\_PATHWAY  
61 - PYRIMIDINE\_METABOLISM  
62 - CHEMOKINE\_SIGNALING\_PATHWAY  
63 - GLYOXYLATE\_AND\_DICARBOXYLATE\_METABOLISM  
64 - DNA\_REPLICATION  
65 - PORPHYRIN\_AND\_CHLOROPHYLL\_METABOLISM  
66 - NITROGEN\_METABOLISM  
67 - PYRUVATE\_METABOLISM  
68 - ARGININE\_AND\_PROLINE\_METABOLISM  
69 - PHENYLALANINE\_METABOLISM  
70 - COMPLEMENT\_AND\_COAGULATION\_CASCADES  
71 - VIRAL\_MYOCARDITIS  
72 - BASAL\_CELL\_CARCINOMA  
73 - CELL\_ADHESION\_MOLECULES\_CAMS

74 - FATTY\_ACID\_METABOLISM  
75 - CITRATE\_CYCLE\_TCA\_CYCLE  
76 - P53\_SIGNALING\_PATHWAY  
77 - TAURINE\_AND\_HYPOTAURINE\_METABOLISM  
78 - LYSOSOME  
79 - HISTIDINE\_METABOLISM  
80 - SNARE\_INTERACTIONS\_IN\_VESICULAR\_TRANSPORT  
81 - N\_GLYCAN\_BIOSYNTHESIS  
82 - SELENOAMINO\_ACID\_METABOLISM  
83 - FRUCTOSE\_AND\_MANNOSE\_METABOLISM  
84 - AMINO\_SUGAR\_AND\_NUCLEOTIDE\_SUGAR\_METABOLISM  
85 - CYSTEINE\_AND\_METHIONINE\_METABOLISM  
86 - RENIN\_ANGIOTENSIN\_SYSTEM  
87 - STEROID\_HORMONE\_BIOSYNTHESIS  
88 - PRIMARY\_BILE\_ACID\_BIOSYNTHESIS  
89 - PENTOSE\_AND\_GLUCURONATE\_INTERCONVERSIONS  
90 - VASOPRESSIN\_REGULATED\_WATER\_REABSORPTION  
91 - AMYOTROPHIC\_LATERAL\_SCLEROSIS\_ALS  
92 - PROTEIN\_EXPORT  
93 - DRUG\_METABOLISM\_OTHER\_ENZYMES  
94 - GLYCOSPHINGOLIPID\_BIOSYNTHESIS\_GLOBO\_SERIES  
95 - HEDGEHOG\_SIGNALING\_PATHWAY  
96 - CELL\_CYCLE  
97 - ASCORBATE\_AND\_ALDARATE\_METABOLISM  
98 - NUCLEOTIDE\_EXCISION\_REPAIR  
99 - PENTOSE\_PHOSPHATE\_PATHWAY  
100 - PANTOTHENATE\_AND\_COA\_BIOSYNTHESIS  
101 - BUTANOATE\_METABOLISM  
102 - RIBOFLAVIN\_METABOLISM  
103 - BASAL\_TRANSCRIPTION\_FACTORS  
104 - ALANINE ASPARTATE AND GLUTAMATE\_METABOLISM  
105 - LIMONENE\_AND\_PINENE\_DEGRADATION  
106 - GLYCEROLIPID\_METABOLISM  
107 - VIBRIO\_CHOLERAE\_INFECTION  
108 - VEGF\_SIGNALING\_PATHWAY  
109 - GNRH\_SIGNALING\_PATHWAY  
110 - MELANOGENESIS  
111 - AMINOACYL\_TRNA\_BIOSYNTHESIS  
112 - NOTCH\_SIGNALING\_PATHWAY  
113 - PURINE\_METABOLISM  
114 - HOMOLOGOUS\_RECOMBINATION  
115 - HYPERTROPHIC\_CARDIOMYOPATHY\_HCM  
116 - GLYCEROPHOSPHOLIPID\_METABOLISM  
117 - ONE\_CARBON\_POOL\_BY\_FOLATE  
118 - MISMATCH\_REPAIR  
119 - GLYCOSAMINOGLYCAN\_DEGRADATION  
120 - SPHINGOLIPID\_METABOLISM  
121 - TRYPTOPHAN\_METABOLISM  
122 - TGF\_BETA\_SIGNALING\_PATHWAY  
123 - OOCYTE\_MEIOSIS  
124 - MAPK\_SIGNALING\_PATHWAY  
125 - VALINE\_LEUCINE\_AND\_ISOLEUCINE\_DEGRADATION  
126 - GALACTOSE\_METABOLISM  
127 - LEUKOCYTE\_TRANSENDOTHELIAL\_MIGRATION  
128 - ADIPOCYTOKINE\_SIGNALING\_PATHWAY  
129 - PROPANOATE\_METABOLISM  
130 - ALDOSTERONE\_REGULATED\_SODIUM\_REABSORPTION  
131 - LYSINE\_DEGRADATION  
132 - GLYCOSAMINOGLYCAN\_BIOSYNTHESIS\_CHONDROITIN\_SULFATE  
133 - APOPTOSIS  
134 - ENDOCYTOSIS  
135 - BIOSYNTHESIS\_OF\_UNSATURATED\_FATTY\_ACIDS  
136 - EPITHELIAL\_CELL\_SIGNALING\_IN\_HELICOBACTER\_PYLORI\_INFECTION  
137 - FC\_EPSILON\_RI\_SIGNALING\_PATHWAY  
138 - STARCH\_AND\_SUCROSE\_METABOLISM  
139 - INSULIN\_SIGNALING\_PATHWAY  
140 - WNT\_SIGNALING\_PATHWAY  
141 - NICOTINATE\_AND\_NICOTINAMIDE\_METABOLISM  
142 - PATHWAYS\_IN\_CANCER  
143 - UBIQUITIN\_MEDIATED\_PROTEOLYSIS  
144 - BETA\_ALANINE\_METABOLISM  
145 - CIRCADIAN\_RHYTHM\_MAMMAL  
146 - PROGESTERONE\_MEDIATED\_OOCYTE\_MATURATION  
147 - VASCULAR\_SMOOTH\_MUSCLE\_CONTRACTION  
148 - TIGHT\_JUNCTION  
149 - GAP\_JUNCTION

150 - THYROID\_CANCER  
151 - MELANOMA  
152 - CALCIUM\_SIGNALING\_PATHWAY  
153 - NEUROTROPHIN\_SIGNALING\_PATHWAY  
154 - NON\_HOMOLOGOUS\_END\_JOINING  
155 - GLYCOSPHINGOLIPID\_BIOSYNTHESIS\_GANGLIO\_SERIES  
156 - GLYCOSAMINOGLYCAN\_BIOSYNTHESIS\_HEPARAN\_SULFATE  
157 - T\_CELL\_RECEPTOR\_SIGNALING\_PATHWAY  
158 - MTOR\_SIGNALING\_PATHWAY  
159 - COLORECTAL\_CANCER  
160 - REGULATION\_OF\_ACTIN\_CYTOSKELETON  
161 - CHRONIC\_MYELOID\_LEUKEMIA  
162 - INOSITOL\_PHOSPHATE\_METABOLISM  
163 - PROSTATE\_CANCER  
164 - FC\_GAMMA\_R\_MEDIATED\_PHAGOCYTOSIS  
165 - DILATED\_CARDIOMYOPATHY  
166 - PANCREATIC\_CANCER  
167 - B\_CELL\_RECEPTOR\_SIGNALING\_PATHWAY  
168 - ACUTE\_MYELOID\_LEUKEMIA  
169 - SMALL\_CELL\_LUNG\_CANCER  
170 - RENAL\_CELL\_CARCINOMA  
171 - TYPE\_II\_DIABETES\_MELLITUS  
172 - ECM\_RECEPTOR\_INTERACTION  
173 - O\_GLYCAN\_BIOSYNTHESIS  
174 - FOCAL\_ADHESION  
175 - GLIOMA  
176 - LONG\_TERM\_DEPRESSION  
177 - PHOSPHATIDYLINOSITOL\_SIGNALING\_SYSTEM  
178 - ABC\_TRANSPORTERS  
179 - LONG\_TERM\_POTENTIATION  
180 - ARRHYTHMOGENIC\_RIGHT\_VENTRICULAR\_CARDIOMYOPATHY\_ARVC  
181 - ENDOMETRIAL\_CANCER  
182 - ERBB\_SIGNALING\_PATHWAY  
183 - NON\_SMALL\_CELL\_LUNG\_CANCER  
184 - DORSO\_VENTRAL\_AXIS\_FORMATION  
185 - ADHERENS\_JUNCTION  
186 - AXON\_GUIDANCE

## Note S2 The list of KEGG pathway names, in the same order as in Figure 2B

1 - LIMONENE\_AND\_PINENE\_DEGRADATION  
2 - ASTHMA  
3 - OLFATORY\_TRANSDUCTION  
4 - ALLOGRAFT\_REJECTION  
5 - BUTANOATE\_METABOLISM  
6 - REGULATION\_OF\_AUTOPHAGY  
7 - HISTIDINE\_METABOLISM  
8 - O\_GLYCAN\_BIOSYNTHESIS  
9 - GLYCOSAMINOGLYCAN\_BIOSYNTHESIS\_HEPARAN\_SULFATE  
10 - ASCORBATE\_AND\_ALDARATE\_METABOLISM  
11 - AUTOIMMUNE\_THYROID\_DISEASE  
12 - BETA\_ALANINE\_METABOLISM  
13 - GLYCOSAMINOGLYCAN\_BIOSYNTHESIS\_CHONDROITIN\_SULFATE  
14 - TYPE\_I\_DIABETES\_MELLITUS  
15 - ALPHA\_LINOLENIC\_ACID\_METABOLISM  
16 - RNA\_DEGRADATION  
17 - GRAFT\_VERSUS\_HOST\_DISEASE  
18 - BASAL\_TRANSCRIPTION\_FACTORS  
19 - ETHER\_LIPID\_METABOLISM  
20 - PRIMARY\_BILE\_ACID\_BIOSYNTHESIS  
21 - GLYOXYLATE\_AND\_DICARBOXYLATE\_METABOLISM  
22 - GLYCOSAMINOGLYCAN\_BIOSYNTHESIS\_KERATAN\_SULFATE  
23 - GLYCOSPHINGOLIPID\_BIOSYNTHESIS\_GANGLIO\_SERIES  
24 - SYSTEMIC\_LUPUS\_ERYTHEMATOSUS  
25 - RIBOSOME  
26 - SPLICEOSOME  
27 - STEROID\_HORMONE\_BIOSYNTHESIS  
28 - PATHOGENIC\_ESCHERICHIA\_COLI\_INFECTION  
29 - PORPHYRIN\_AND\_CHLOROPHYLL\_METABOLISM  
30 - AMINOACYL\_TRNA\_BIOSYNTHESIS  
31 - PENTOSE\_AND\_GLUCURONATE\_INTERCONVERSIONS  
32 - VIBRIO\_CHOLERAE\_INFECTION  
33 - CIRCADIAN\_RHYTHM\_MAMMAL  
34 - OXIDATIVE\_PHOSPHORYLATION  
35 - GLYCOSYLPHOSPHATIDYLINOSITOL\_GPI\_ANCHOR\_BIOSYNTHESIS  
36 - MATURITY\_ONSET\_DIABETES\_OF\_THE\_YOUNG  
37 - DNA\_REPLICATION  
38 - N\_GLYCAN\_BIOSYNTHESIS  
39 - PROTEIN\_EXPORT  
40 - COMPLEMENT\_AND\_COAGULATION\_CASCADES  
41 - PROXIMAL\_TUBULE\_BICARBONATE\_RECLAMATION  
42 - HEDGEHOG\_SIGNALING\_PATHWAY  
43 - VALINE\_LEUCINE\_AND\_ISOLEUCINE\_DEGRADATION  
44 - LYSINE\_DEGRADATION  
45 - NICOTINATE\_AND\_NICOTINAMIDE\_METABOLISM  
46 - FOLATE\_BIOSYNTHESIS  
47 - BIOSYNTHESIS\_OF\_UNSATURATED\_FATTY\_ACIDS  
48 - PROTEASOME  
49 - NUCLEOTIDE\_EXCISION\_REPAIR  
50 - BASAL\_CELL\_CARCINOMA  
51 - TYROSINE\_METABOLISM  
52 - STARCH\_AND\_SUCROSE\_METABOLISM  
53 - GLYCINE\_SERINE\_AND\_THREONINE\_METABOLISM  
54 - METABOLISM\_OF\_XENOBIOTICS\_BY\_CYTOCHROME\_P450  
55 - ANTIGEN\_PROCESSING\_AND\_PRESENTATION  
56 - EPITHELIAL\_CELL\_SIGNALING\_IN\_HELICOBACTER\_PYLORI\_INFECTION  
57 - LINOLEIC\_ACID\_METABOLISM  
58 - SNARE\_INTERACTIONS\_IN\_VESICULAR\_TRANSPORT  
59 - PARKINSONS\_DISEASE  
60 - HOMOLOGOUS\_RECOMBINATION  
61 - INTESTINAL\_IMMUNE\_NETWORK\_FOR\_IGA\_PRODUCTION  
62 - RETINOL\_METABOLISM  
63 - CARDIAC\_MUSCLE\_CONTRACTION  
64 - PHENYLALANINE\_METABOLISM  
65 - DRUG\_METABOLISM\_CYTOCHROME\_P450  
66 - ABC\_TRANSPORTERS  
67 - FC\_EPSILON\_RI\_SIGNALING\_PATHWAY  
68 - PRION\_DISEASES  
69 - LEISHMANIA\_INFECTION  
70 - GALACTOSE\_METABOLISM  
71 - CHEMOKINE\_SIGNALING\_PATHWAY  
72 - LYSOSOME  
73 - TGF\_BETA\_SIGNALING\_PATHWAY

74 - RENIN\_ANGIOTENSIN\_SYSTEM  
75 - TASTE\_TRANSDUCTION  
76 - ARACHIDONIC\_ACID\_METABOLISM  
77 - GLYCEROLIPID\_METABOLISM  
78 - GAP\_JUNCTION  
79 - INSULIN\_SIGNALING\_PATHWAY  
80 - STEROID\_BIOSYNTHESIS  
81 - ALANINE\_ASPARTATE\_AND\_Glutamate\_METABOLISM  
82 - PROPANOATE\_METABOLISM  
83 - PANTOTHENATE\_AND\_COA\_BIOSYNTHESIS  
84 - DORSO\_VENTRAL\_AXIS\_FORMATION  
85 - CYTOSOLIC\_DNA\_SENSING\_PATHWAY  
86 - NOTCH\_SIGNALING\_PATHWAY  
87 - HUNTINGTONS\_DISEASE  
88 - TRYPTOPHAN\_METABOLISM  
89 - SPHINGOLIPID\_METABOLISM  
90 - PYRUVATE\_METABOLISM  
91 - PEROXISOME  
92 - ENDOCYTOSIS  
93 - INOSITOL\_PHOSPHATE\_METABOLISM  
94 - NON\_SMALL\_CELL\_LUNG\_CANCER  
95 - GLYCEROPHOSPHOLIPID\_METABOLISM  
96 - CITRATE\_CYCLE\_TCA\_CYCLE  
97 - TERPENOID\_BACKBONE\_BIOSYNTHESIS  
98 - CYTOKINE\_CYTOKINE\_RECEPTOR\_INTERACTION  
99 - CELL\_ADHESION\_MOLECULES\_CAMS  
100 - TIGHT\_JUNCTION  
101 - RNA\_POLYMERASE  
102 - LEUKOCYTE\_TRANSENDOTHELIAL\_MIGRATION  
103 - MELANOGENESIS  
104 - FATTY\_ACID\_METABOLISM  
105 - SMALL\_CELL\_LUNG\_CANCER  
106 - GNRH\_SIGNALING\_PATHWAY  
107 - NEUROACTIVE\_LIGAND\_RECEPTOR\_INTERACTION  
108 - PENTOSE\_PHOSPHATE\_PATHWAY  
109 - SELENOAMINO\_ACID\_METABOLISM  
110 - SULFUR\_METABOLISM  
111 - NON\_HOMOLOGOUS\_END\_JOINING  
112 - ECM\_RECEPTOR\_INTERACTION  
113 - REGULATION\_OF\_ACTIN\_CYTOSKELETON  
114 - PYRIMIDINE\_METABOLISM  
115 - VASCULAR\_SMOOTH\_MUSCLE\_CONTRACTION  
116 - DRUG\_METABOLISM\_OTHER\_ENZYMES  
117 - RENAL\_CELL\_CARCINOMA  
118 - PHOSPHATIDYLINOSITOL\_SIGNALING\_SYSTEM  
119 - CELL\_CYCLE  
120 - VIRAL\_MYOCARDITIS  
121 - GLYCOLYSIS\_GLUCCONEOGENESIS  
122 - AXON\_GUIDANCE  
123 - CHRONIC\_MYELOID\_LEUKEMIA  
124 - ALDOSTERONE\_REGULATED\_SODIUM\_REABSORPTION  
125 - ALZHEIMERS\_DISEASE  
126 - NATURAL\_KILLER\_CELL\_MEDIATED\_CYTOTOXICITY  
127 - HYPERTROPHIC\_CARDIOMYOPATHY\_HCM  
128 - PRIMARY\_IMMUNODEFICIENCY  
129 - JAK\_STAT\_SIGNALING\_PATHWAY  
130 - MTOR\_SIGNALING\_PATHWAY  
131 - LONG\_TERM\_POTENTIATION  
132 - B\_CELL\_RECEPTOR\_SIGNALING\_PATHWAY  
133 - ARRHYTHMOGENIC\_RIGHT\_VENTRICULAR\_CARDIOMYOPATHY\_ARVC  
134 - FOCAL\_ADHESION  
135 - FRUCTOSE\_AND\_MANNANOSE\_METABOLISM  
136 - FC\_GAMMA\_R\_MEDIATED\_PHAGOCYTOSIS  
137 - DILATED\_CARDIOMYOPATHY  
138 - GLUTATHIONE\_METABOLISM  
139 - PURINE\_METABOLISM  
140 - VALINE\_LEUCINE\_AND\_ISOLEUCINE\_BIOSYNTHESIS  
141 - BASE\_EXCISION\_REPAIR  
142 - VASOPRESSIN\_REGULATED\_WATER\_REABSORPTION  
143 - GLIOMA  
144 - LONG\_TERM\_DEPRESSION  
145 - TOLL\_LIKE\_RECEPTOR\_SIGNALING\_PATHWAY  
146 - UBIQUITIN\_MEDIATED\_PROTEOLYSIS  
147 - T\_CELL\_RECEPTOR\_SIGNALING\_PATHWAY  
148 - OTHER\_GLYCAN\_DEGRADATION  
149 - MAPK\_SIGNALING\_PATHWAY

150 - ARGININE\_AND\_PROLINE\_METABOLISM  
151 - OOCYTE\_MEIOSIS  
152 - GLYCOSPHINGOLIPID\_BIOSYNTHESIS\_LACTO\_AND\_NEOLACTO\_SERIES  
153 - PATHWAYS\_IN\_CANCER  
154 - ADIPOCYTOKINE\_SIGNALING\_PATHWAY  
155 - WNT\_SIGNALING\_PATHWAY  
156 - MELANOMA  
157 - NEUROTROPHIN\_SIGNALING\_PATHWAY  
158 - TAURINE\_AND\_HYPOTAURINE\_METABOLISM  
159 - VEGF\_SIGNALING\_PATHWAY  
160 - AMINO\_SUGAR\_AND\_NUCLEOTIDE\_SUGAR\_METABOLISM  
161 - CYSTEINE\_AND\_METHIONINE\_METABOLISM  
162 - RIG\_I\_LIKE\_RECEPTOR\_SIGNALING\_PATHWAY  
163 - AMYOTROPHIC\_LATERAL\_SCLEROSIS\_ALS  
164 - ENDOMETRIAL\_CANCER  
165 - PROSTATE\_CANCER  
166 - GLYCOSPHINGOLIPID\_BIOSYNTHESIS\_GLOBO\_SERIES  
167 - PANCREATIC\_CANCER  
168 - NITROGEN\_METABOLISM  
169 - PPAR\_SIGNALING\_PATHWAY  
170 - MISMATCH\_REPAIR  
171 - ADHERENS\_JUNCTION  
172 - HEMATOPOIETIC\_CELL\_LINEAGE  
173 - PROGESTERONE\_MEDIATED\_OOCYTE\_MATURATION  
174 - COLORECTAL\_CANCER  
175 - CALCIUM\_SIGNALING\_PATHWAY  
176 - ERBB\_SIGNALING\_PATHWAY  
177 - ONE\_CARBON\_POOL\_BY\_FOLATE  
178 - GLYCOSAMINOGLYCAN\_DEGRADATION  
179 - BLADDER\_CANCER  
180 - TYPE\_II\_DIABETES\_MELLITUS  
181 - NOD\_LIKE\_RECEPTOR\_SIGNALING\_PATHWAY  
182 - APOPTOSIS  
183 - RIBOFLAVIN\_METABOLISM  
184 - ACUTE\_MYELOID\_LEUKEMIA  
185 - P53\_SIGNALING\_PATHWAY  
186 - THYROID\_CANCER

**Table S1 The distribution metrics for the pathway-averaged  $L^{tr}$  and  $N^{tr}$  values among the cancer and other pathways, corresponding to the boxplots in Figure 1A,B**

| measures                 | pathway-averaged $L^{tr}$ boxplots (Fig. 1A) |        | pathway-averaged $N^{tr}$ boxplots (Fig. 1B) |        |
|--------------------------|----------------------------------------------|--------|----------------------------------------------|--------|
|                          | other                                        | cancer | other                                        | cancer |
| minimum                  | 6250                                         | 50610  | 1.142                                        | 2.073  |
| 1 <sup>st</sup> quartile | 37140                                        | 75730  | 1.827                                        | 2.371  |
| median                   | 52630                                        | 82750  | 2.069                                        | 2.535  |
| mean                     | 61420                                        | 86250  | 2.079                                        | 2.597  |
| 3 <sup>rd</sup> quartile | 80480                                        | 95260  | 2.307                                        | 2.791  |
| maximum                  | 203600                                       | 136100 | 3.413                                        | 3.345  |



**Table S2 The KEGG pathway enrichment analysis for the genes significantly associated with autism spectrum disorder (ASD)**

| Genes significantly associated with ASD [FDR<0.05] |                 |                         |
|----------------------------------------------------|-----------------|-------------------------|
| KEGG pathway                                       | Number of genes | $p^{\text{EASE}}$ score |
| Cell adhesion molecules, CAMs                      | 5               | $1.84 \cdot 10^{-3}$    |
| Neuroactive ligand-receptor interaction            | 6               | $3.25 \cdot 10^{-3}$    |
| Long-term potentiation                             | 3               | $3.14 \cdot 10^{-2}$    |
| Long-term depression                               | 3               | $3.23 \cdot 10^{-2}$    |
| Calcium signaling pathway                          | 4               | $3.43 \cdot 10^{-2}$    |

The significantly enriched KEGG pathways are revealed via DAVID gene functional annotation server, taking *Homo sapiens* as a correction background. The  $p^{\text{EASE}}$  significance scores for the enrichment are shown along with the number of hit genes. The full list of genes that appear in each enriched pathway can be found in Additional file 3. The gene set is taken from King *et al*, *Nature*, 501:58-62, 2013.

**Table S3 The KEGG pathway enrichment analysis for the top genes by summed exon length**

| Genes with longest total exon                       |                 |                      |
|-----------------------------------------------------|-----------------|----------------------|
| KEGG pathway                                        | Number of genes | $p^{EASE}$ score     |
| Focal adhesion                                      | 30              | $6.69 \cdot 10^{-8}$ |
| ECM-receptor interaction                            | 18              | $3.28 \cdot 10^{-7}$ |
| Calcium signaling pathway (*,#)                     | 25              | $2.77 \cdot 10^{-6}$ |
| Long-term potentiation (*)                          | 12              | $3.46 \cdot 10^{-4}$ |
| Long-term depression (*)                            | 12              | $3.94 \cdot 10^{-4}$ |
| Pathways in cancer (+)                              | 31              | $4.26 \cdot 10^{-4}$ |
| MAPK signaling pathway (+)                          | 26              | $9.37 \cdot 10^{-4}$ |
| Hypertrophic cardiomyopathy, HCM (#)                | 12              | $2.33 \cdot 10^{-3}$ |
| Arrhythmogenic right ventricular cardiomyopathy (#) | 11              | $3.23 \cdot 10^{-3}$ |
| Dilated cardiomyopathy (#)                          | 12              | $4.37 \cdot 10^{-3}$ |
| Small cell lung cancer (+)                          | 11              | $6.67 \cdot 10^{-3}$ |
| Type II diabetes mellitus (**)                      | 8               | $6.67 \cdot 10^{-3}$ |
| Vascular smooth muscle contraction                  | 13              | $7.23 \cdot 10^{-3}$ |
| Gap junction                                        | 11              | $9.95 \cdot 10^{-3}$ |
| Wnt signaling pathway                               | 15              | $1.34 \cdot 10^{-2}$ |
| Axon guidance (*)                                   | 13              | $2.08 \cdot 10^{-2}$ |
| Phosphatidylinositol signaling system               | 9               | $2.50 \cdot 10^{-2}$ |
| Fatty acid biosynthesis                             | 3               | $3.05 \cdot 10^{-2}$ |
| Colorectal cancer (+)                               | 9               | $4.81 \cdot 10^{-2}$ |

The genes with summed exon length greater than the all-data median by twice the standard deviation are used. The significantly enriched KEGG pathways are revealed via DAVID gene functional annotation server, taking *Homo sapiens* as a correction background. The  $p^{EASE}$  significance scores for the enrichment are shown along with the number of hit genes. The notations in the brackets mark the pathways linked to cancer (+), neurological (\*), cardiological (#) and other (\*\*) multigenic pathological conditions. The full list of genes that appear in each enriched pathway can be found in Additional file 3.

**Table S4 The KEGG pathway enrichment analysis for the top genes by transcript length**

| Genes with longest transcript                       |                 |                       |
|-----------------------------------------------------|-----------------|-----------------------|
| KEGG pathway                                        | Number of genes | $p^{EASE}$ score      |
| Calcium signaling pathway (*,#)                     | 27              | 5.61 10 <sup>-9</sup> |
| Axon guidance (*)                                   | 23              | 6.09 10 <sup>-9</sup> |
| Long-term potentiation (*)                          | 16              | 5.18 10 <sup>-8</sup> |
| Long-term depression (*)                            | 16              | 6.39 10 <sup>-8</sup> |
| Vascular smooth muscle contraction                  | 16              | 3.76 10 <sup>-5</sup> |
| Arrhythmogenic right ventricular cardiomyopathy (#) | 13              | 4.46 10 <sup>-5</sup> |
| Hypertrophic cardiomyopathy, HCM (#)                | 13              | 1.37 10 <sup>-4</sup> |
| Phosphatidylinositol signaling system               | 12              | 1.63 10 <sup>-4</sup> |
| Gap junction                                        | 13              | 2.15 10 <sup>-4</sup> |
| Dilated cardiomyopathy (#)                          | 13              | 2.95 10 <sup>-4</sup> |
| Neuroactive ligand-receptor interaction (*)         | 23              | 5.90 10 <sup>-4</sup> |
| ErbB signaling pathway                              | 12              | 6.90 10 <sup>-4</sup> |
| GnRH signaling pathway                              | 12              | 1.87 10 <sup>-3</sup> |
| Cell adhesion molecules, CAMs                       | 14              | 2.46 10 <sup>-3</sup> |
| Tight junction                                      | 14              | 2.82 10 <sup>-3</sup> |
| Purine metabolism                                   | 15              | 3.38 10 <sup>-3</sup> |
| MAPK signaling pathway (+)                          | 21              | 5.34 10 <sup>-3</sup> |
| Focal adhesion                                      | 17              | 7.03 10 <sup>-3</sup> |
| Chondroitin sulfate biosynthesis                    | 5               | 1.08 10 <sup>-2</sup> |
| Regulation of actin cytoskeleton                    | 17              | 1.30 10 <sup>-2</sup> |
| Fc gamma R-mediated phagocytosis                    | 10              | 1.42 10 <sup>-2</sup> |
| Heparan sulfate biosynthesis                        | 5               | 1.94 10 <sup>-2</sup> |
| Alzheimer's disease (**)                            | 13              | 3.19 10 <sup>-2</sup> |
| Type II diabetes mellitus (**)                      | 6               | 4.01 10 <sup>-2</sup> |

The genes with longest transcript length greater than the all-data median by twice the standard deviation are used. The significantly enriched KEGG pathways are revealed via DAVID gene functional annotation server, taking *Homo sapiens* as a correction background. The  $p^{EASE}$  significance scores for the enrichment are shown along with the number of hit genes. The notations in the brackets mark the pathways linked to cancer (+), neurological (\*), cardiological (#) and other (\*\*\*) multigenic pathological conditions. The full list of genes that appear in each enriched pathway can be found in Additional file 3.

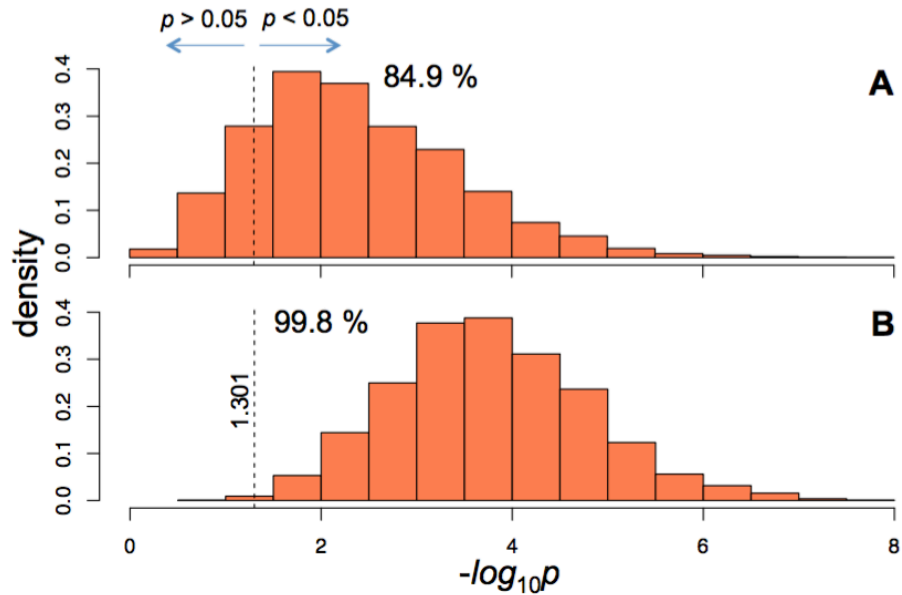

**Figure S1 Further assessment of the shift significance while comparing pathway-averaged  $L^{\text{tr}}$  and  $N^{\text{tr}}$  values in cancer versus other pathways.** The histograms present the distributions of the  $p$ -values while comparing the pathway-averaged  $L^{\text{tr}}$  (A) and  $N^{\text{tr}}$  (B) of the 15 cancer pathways with 15 (equal number) other pathways randomly selected from the available 171. The random selection was done 100000 times, resulting in the above  $p$ -value distributions brought in  $-\log_{10}$  scale, where, for instance, the value 4 means  $p=10^{-4}$ . The dotted vertical lines outline  $p=0.05$  ( $-\log_{10}p=1.301$ ), used as a significance threshold. As can be inferred from the figure, such analysis resulted in significant  $p$ -values for  $L^{\text{tr}}$  and  $N^{\text{tr}}$  84.9% and 99.8% of times respectively. Please note, that this test is done as a direct demonstration of the absence of the size difference bias in the significance of the shifts between the cancer vs. other distributions. However, the size difference is reflected in the used  $p$ -value analyses without the enforced size equalisation, due to the negative ( $p$ -value increase) effect of the low data numbers in either of the distributions, reducing the confidence on the corresponding mean value.

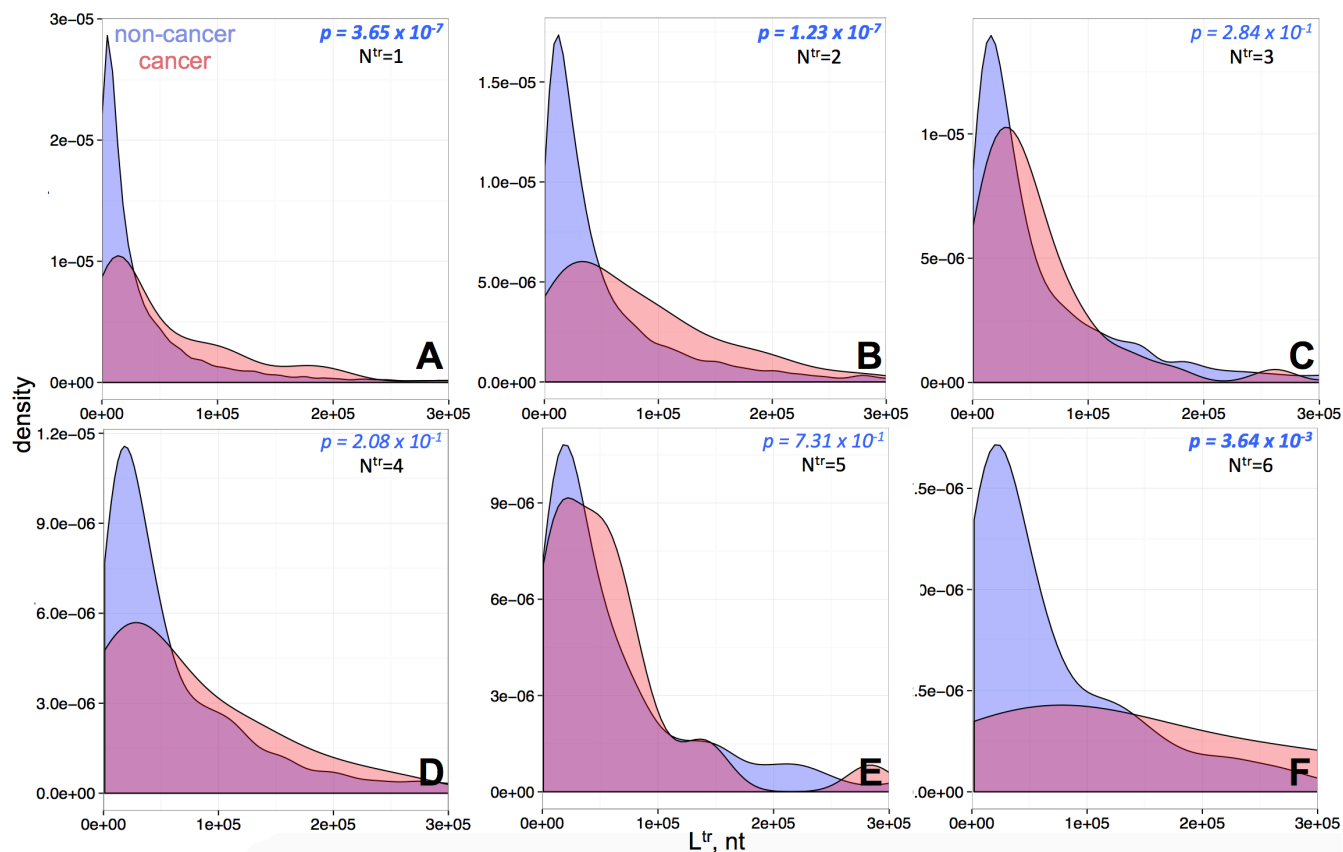

**Figure S2 Distributions of the longest transcript length  $L^{tr}$  in cancer (red) and other (blue) pathways for the genes with different  $N^{tr}$  number of transcripts.** The plots A-F are for the  $N^{tr}$  of 1 to 6. The  $p$ -values reflecting on the significance of a positive shift in the distributions for the cancer pathways are shown on top of each plot. The number of genes in both distribution are {170, 10795}, {91, 3841}, {41, 1964}, {27, 991}, {24, 515} and {9, 313} for the plots A-F correspondingly, brought in the {cancer/red, other/blue} format.

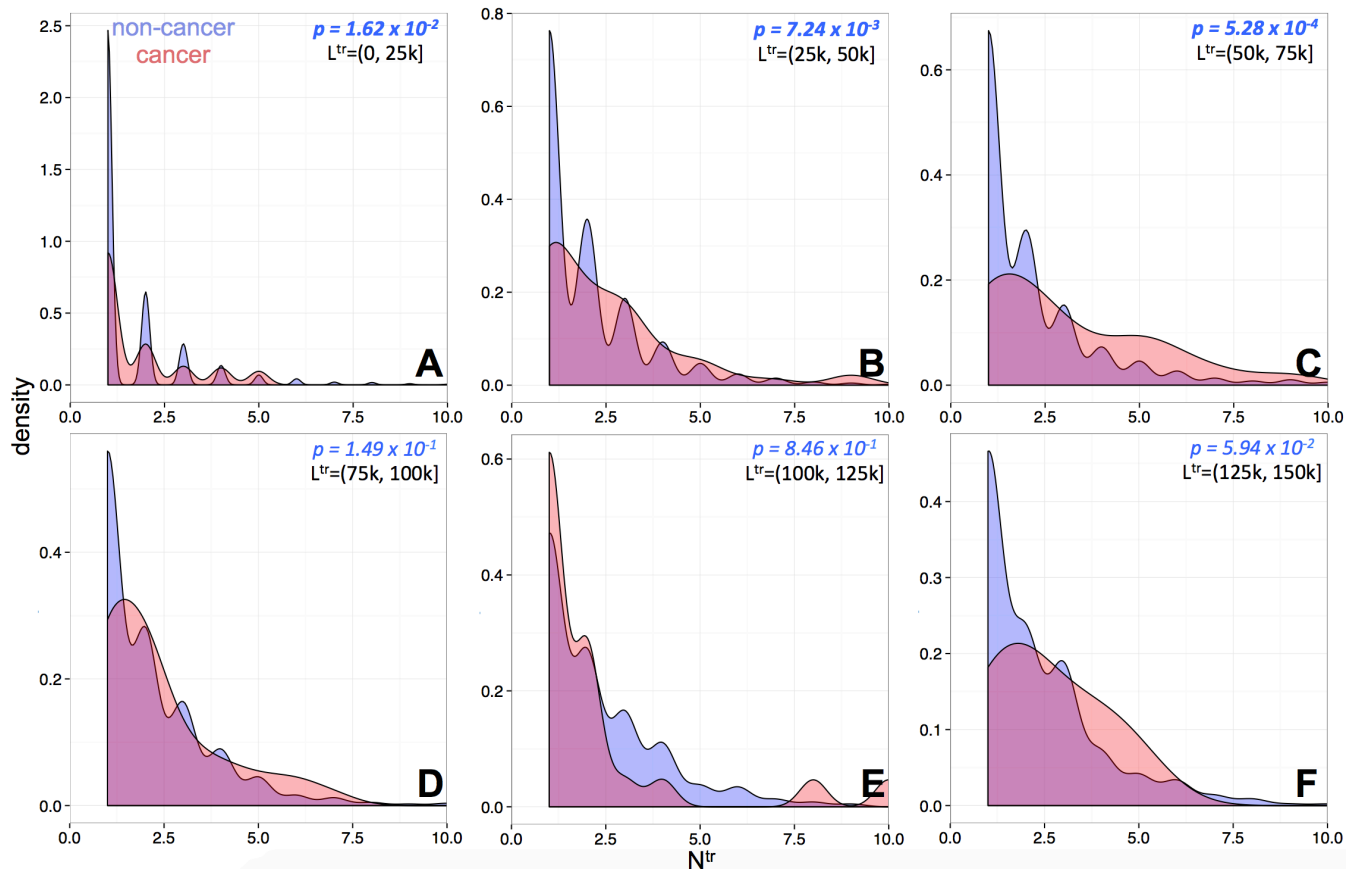

**Figure S3 Distributions of the  $N^{tr}$  number of transcripts in cancer (red) and other (blue) pathways for the genes with different intervals of  $L^{tr}$  longest transcript length.** The  $p$ -values reflecting on the significance of a positive shift in the distributions for the cancer pathways, along with the  $L^{tr}$  interval are shown on top of each plot. The density values (y-axes) peak at discrete integer  $N^{tr}$  (x-axes), with the intermediate values filled due to the smoothing at the density calculation procedure. The latter has no effect on the  $p$ -values that were estimated based on the actual  $N^{tr}$  values, independent from the density calculations. The number of genes in both distribution are  $\{133, 9920\}$ ,  $\{64, 3383\}$ ,  $\{43, 1662\}$ ,  $\{40, 954\}$ ,  $\{24, 687\}$  and  $\{18, 478\}$  for the plots **A-F** correspondingly, brought in the  $\{\text{cancer/red, other/blue}\}$  format.

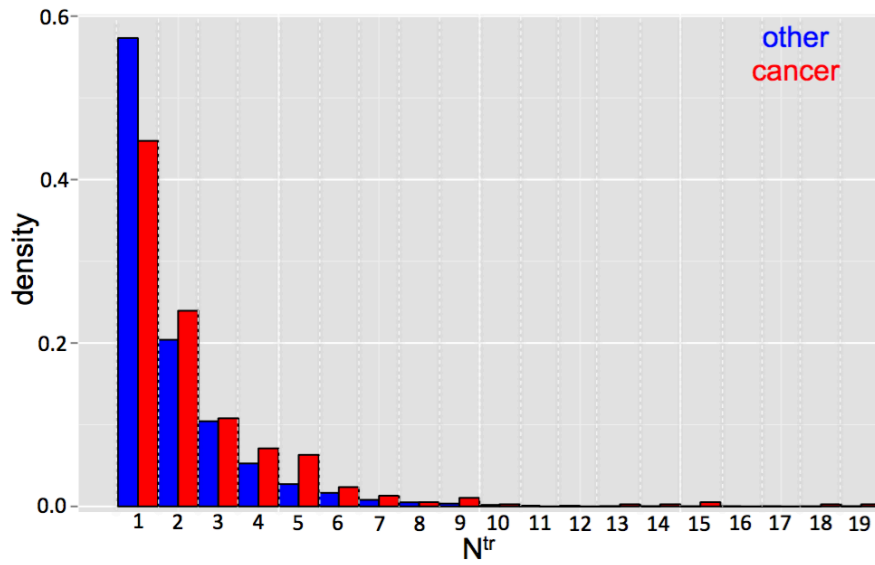

**Figure S4 Distributions of the  $N^{tr}$  number of transcripts in cancer (red) and other (blue) pathways for all the genes.** The plot is the combined and discrete version of Figure S3A-F.

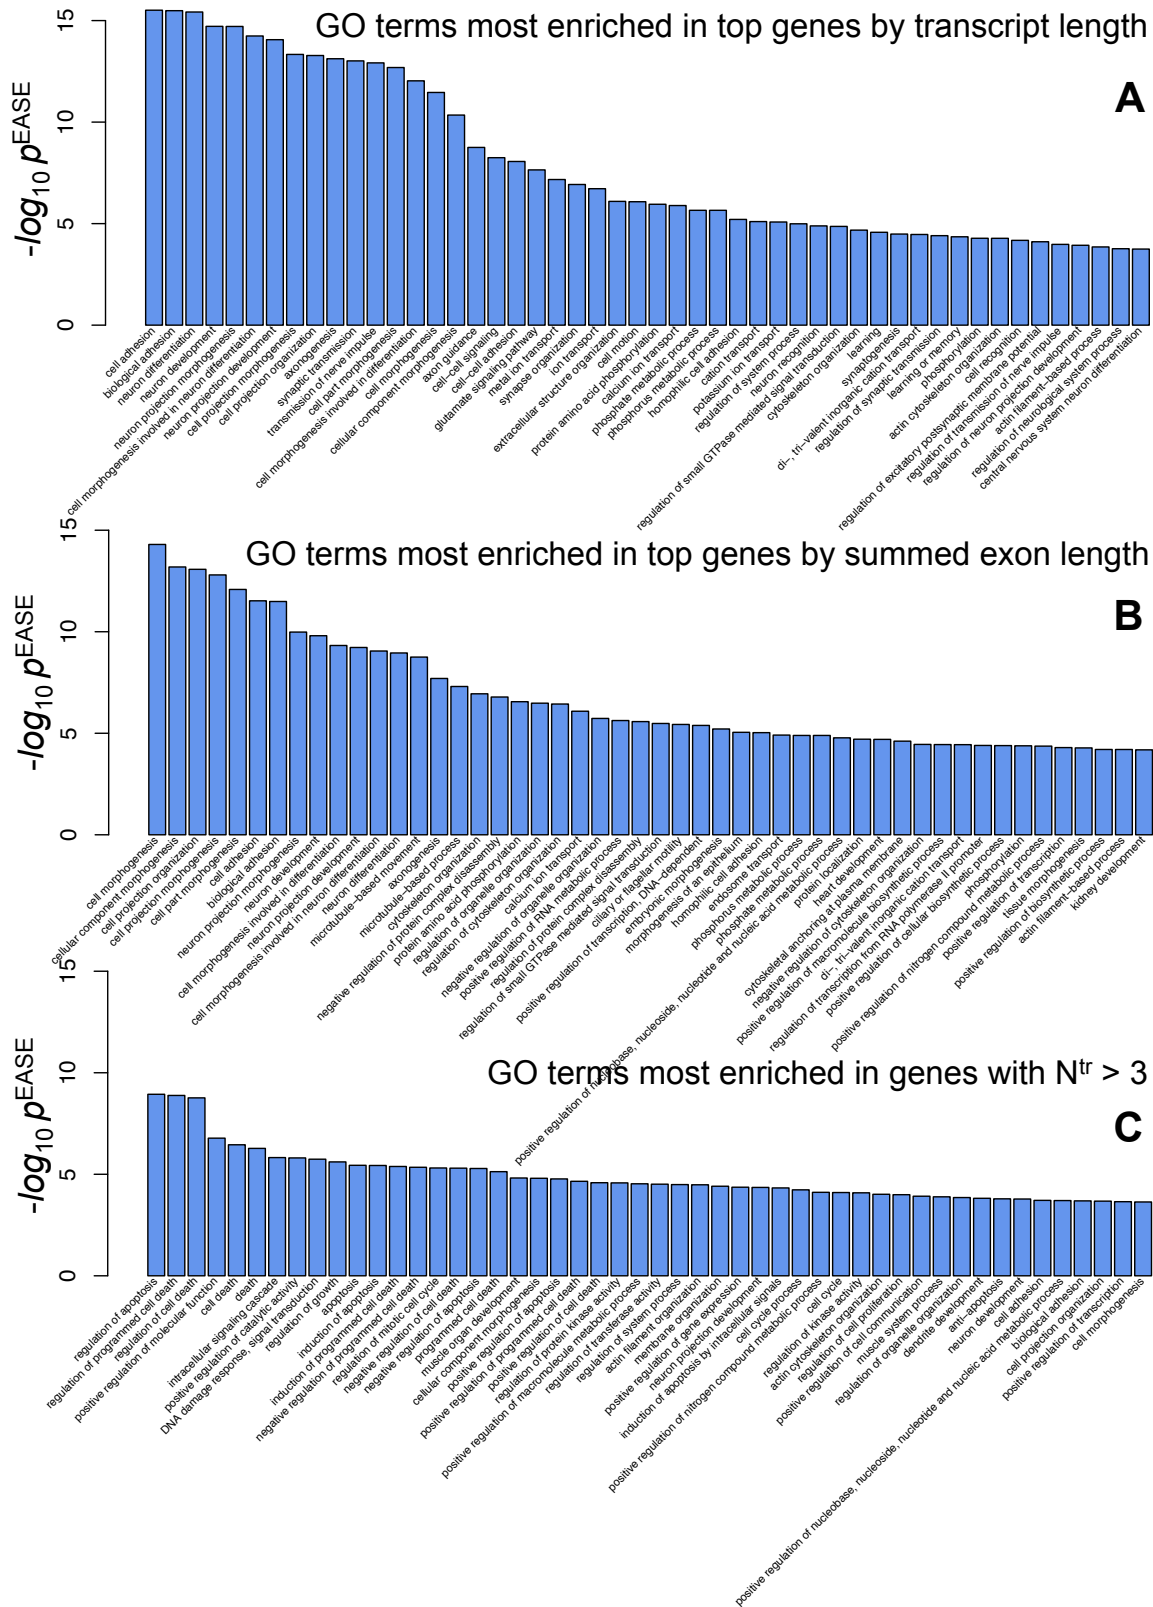

**Figure S5 Gene ontology (GO) analyses for the genes special in length and splicing complexity.** The 50 most enriched GO terms (BP set) are shown for the top genes by longest transcript length (A), top genes by summed exon length (B), and genes with greater than 3 transcript variants (C). The y-axis shows the  $p^{EASE}$  score for the enrichment significance in a  $-\log_{10}$  scale ( $-\log_{10} p^{EASE} > 1.301$  means  $p^{EASE} < 0.05$ ). The full set of significant GO terms and gene lists is presented in Additional file 3.



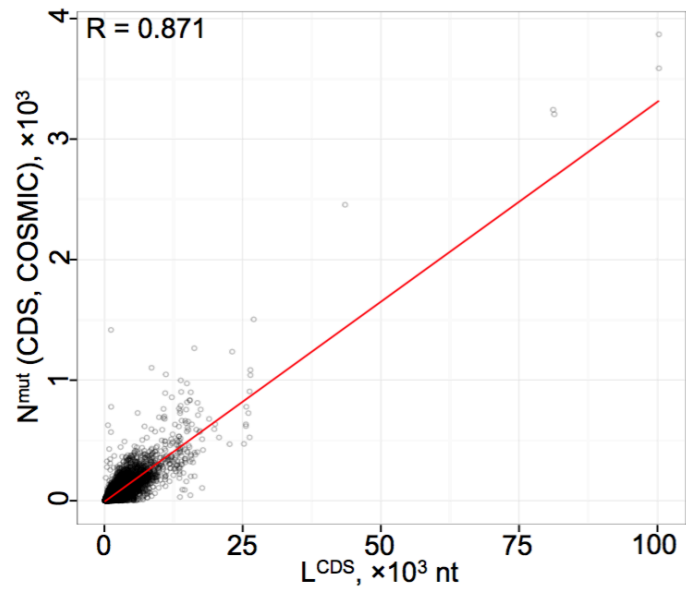

**Figure S6 Correlation between the overall number of cancer-linked mutations in the coding sequences (CDS) of different genes and their CDS length.** The cancer-linked mutations (as deposited in the COSMIC database) are counted from only the coding regions. The correlation coefficient (top-left corner) and the linear mode fit (red line) are shown.

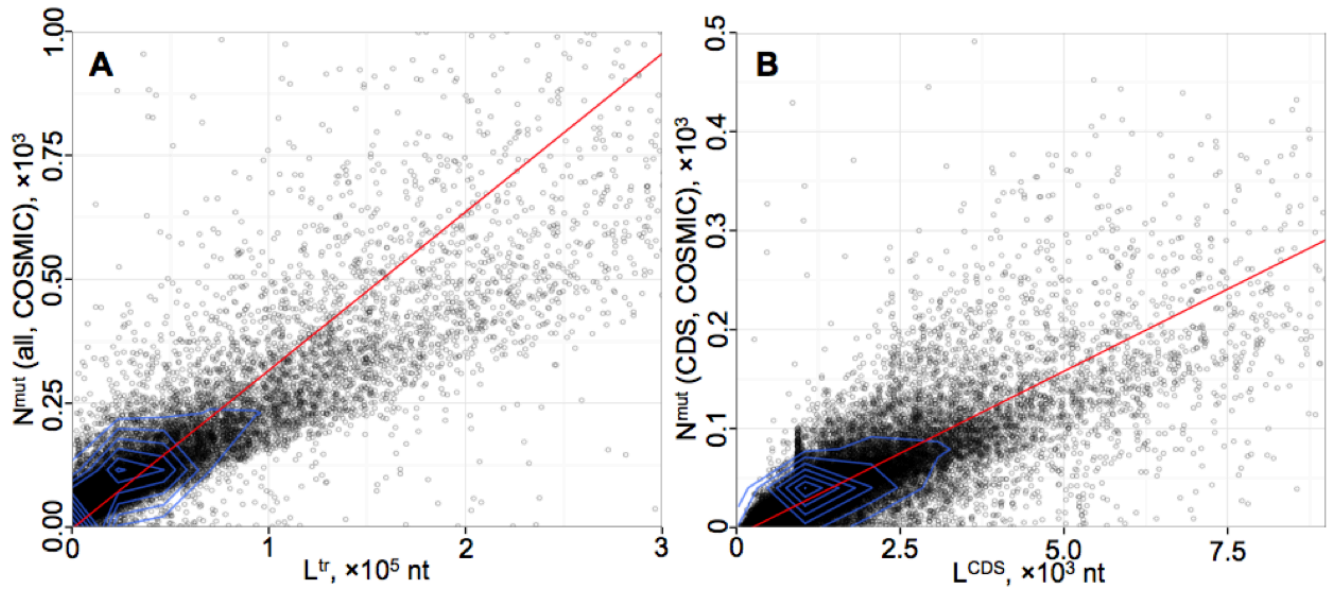

**Figure S7** Plots representing the zoomed versions of Figure 5A (A) and Figure S6 (B). Both A and B graphs detail the lower-left corner of the corresponding original plots, with additional contour lines (blue) added to illustrate the distribution of data points in the crowded region.
